# Supplementary material
Source: PubMed Central journal article supplement (PMC4984538)
Supplement: NIHMS686021-supplement-01.pdf [file NIHMS686021-supplement-01.pdf]

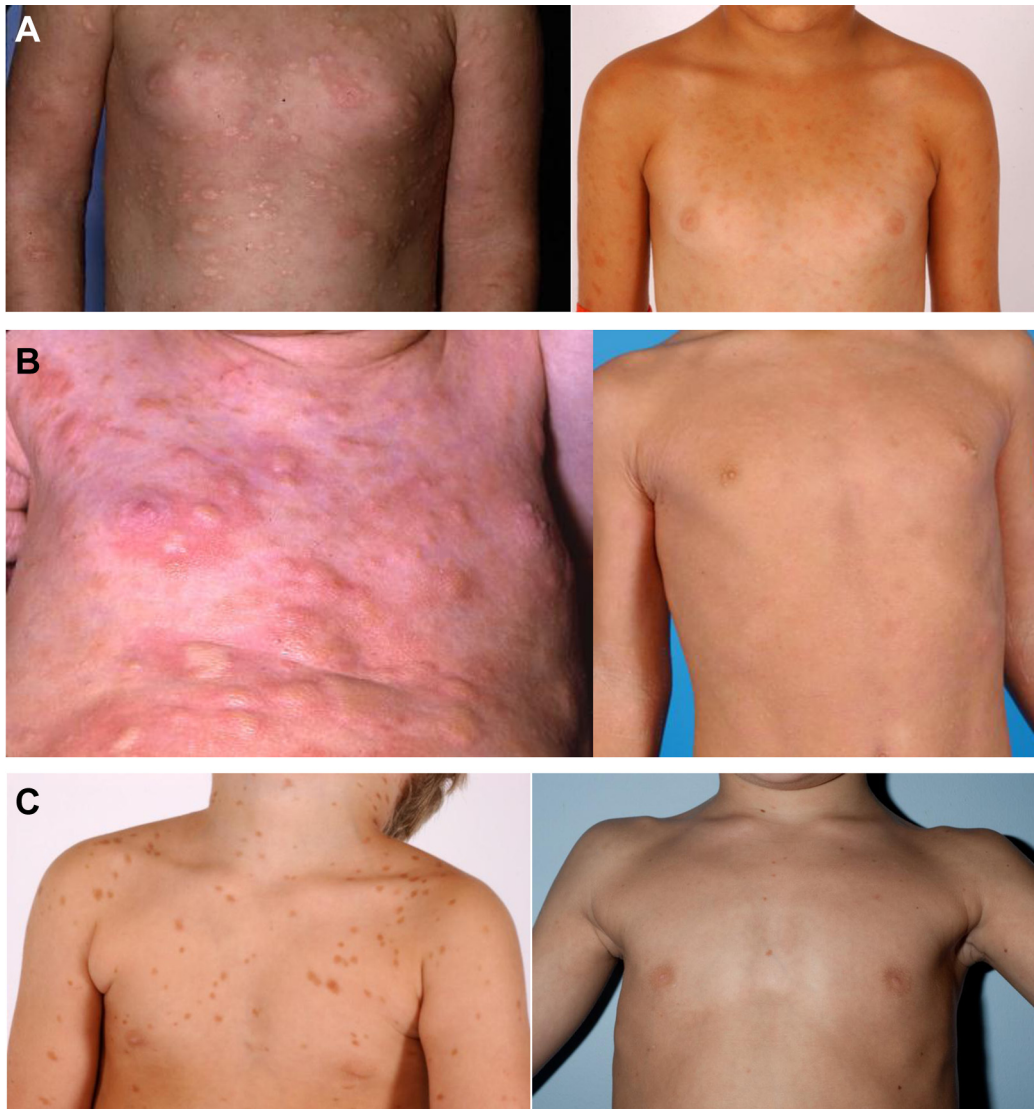

**FIG E2.** Appearance of skin lesions over time with concurrent serum tryptase levels. Regression of skin lesions in patients with UP, predominately maculopapular cutaneous mastocytosis lesions with some nodular lesions that evolve into a strictly maculopapular cutaneous mastocytosis (ages 2 and 7 years; tryptase level, 20 and 6.6 ng/mL, respectively; **A**); DCM (ages 17 months and 9 years; tryptase levels, 17.4 and 4.9 ng/mL, respectively; **B**); and ISM with a typical maculopapular cutaneous mastocytosis pattern (ages 3 and 9 years; tryptase levels, 32.9 and 12.6 ng/mL, respectively; **C**) are shown and are consistent with decreases in serum tryptase levels.

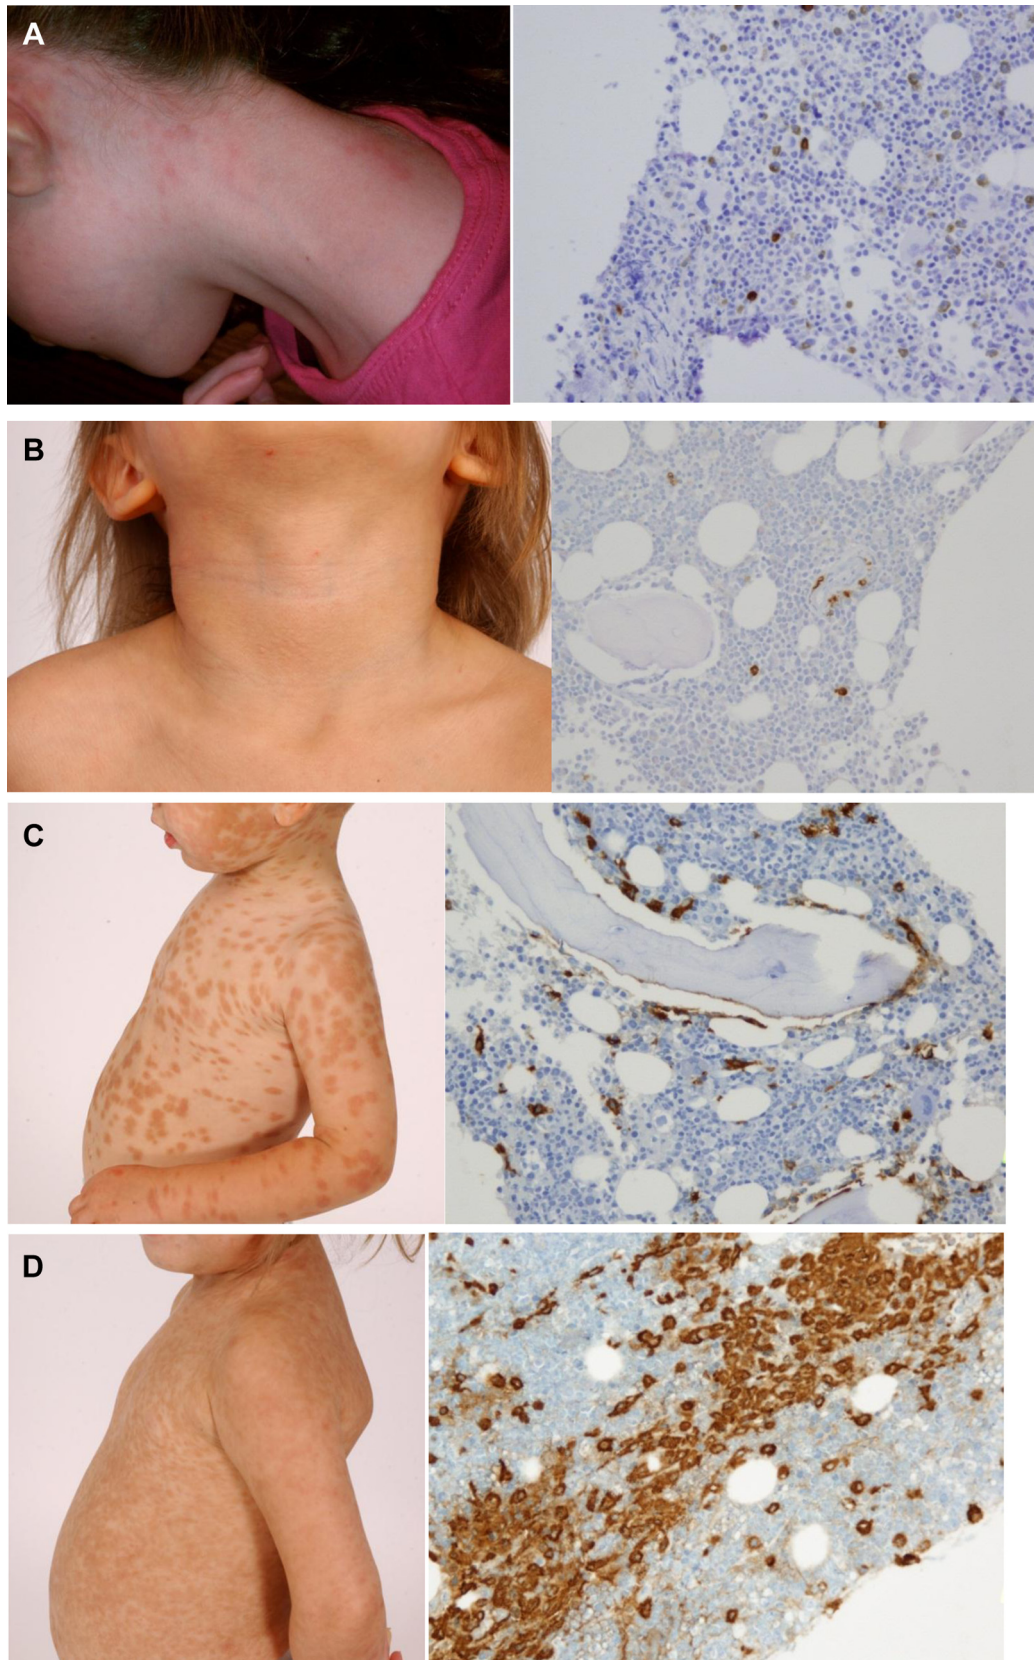

**FIG E3.** Skin appearance, bone marrow pathology, and serum tryptase levels in a patient with UP (tryptase level, 6.1 ng/mL; **A**), DCM (tryptase level, 26.0 ng/mL; **B**), and ISM (**C**: tryptase level, 53.7 ng/mL; **D**: tryptase level, 238.0 ng/mL). Immunohistochemistry staining for tryptase (dark brown) shows that greater than 25% of mast cells within the marrow were spindle shaped. All mast cells were CD25<sup>+</sup>, and the D816V mutation was present. Magnification is  $\times 200$  for all bone marrow biopsy specimens.
